# Supplementary material
Source: publisher figshare collection journal article supplement (https://sage.figshare.com/ndownloader/files/11519795)
Supplement: Supplementary file 1 [file 11519795]

Supplementary Table

*Participants' characteristics*

| Demographic characteristics                |          |      |
|--------------------------------------------|----------|------|
|                                            | <i>N</i> | %    |
| Child's gender (male)                      | 1804     | 47.1 |
| Siblings                                   |          |      |
| Only child                                 | 1127     | 29.6 |
| One sibling                                | 2119     | 55.7 |
| Two siblings                               | 425      | 11.2 |
| Three or more siblings                     | 133      | 3.5  |
| Child's school attendance (primary school) | 2954     | 77.0 |
| Respondent                                 |          |      |
| Mother                                     | 2481     | 64.9 |
| Father                                     | 286      | 7.5  |
| Parents                                    | 1025     | 26.8 |
| Others                                     | 32       | 0.8  |
| Parents' marital status                    |          |      |
| Married                                    | 3240     | 85.3 |
| Cohabitation                               | 151      | 4.0  |

|                                       |      |      |
|---------------------------------------|------|------|
| Divorced                              | 255  | 6.7  |
| Single                                | 132  | 3.5  |
| Widow                                 | 21   | 0.6  |
| Mother's level of education           |      |      |
| More than high school                 | 1162 | 30.5 |
| High school graduate                  | 922  | 24.2 |
| Less than high school                 | 1723 | 45.3 |
| Father's level of education           |      |      |
| More than high school                 | 681  | 18.4 |
| High school graduate                  | 803  | 21.7 |
| Less than high school                 | 2221 | 59.9 |
| Mothers' employment status (employed) | 3080 | 81.4 |
| Father's employment status (employed) | 3581 | 97.2 |
